# Supplementary material
Source: publisher figshare collection journal article supplement (https://acs.figshare.com/ndownloader/files/4283853)
Supplement: Supplementary file 1 [file 4283853]

# Supporting Information

## **Excited-State Intermolecular Proton Transfer of Firefly Luciferin V. Proton Transfer to Fluoride Base**

**by**

**Itay Presiado, Yuval Erez, Rinat Gepshtein and Dan Huppert**

*Raymond and Beverly Sackler Faculty of Exact Sciences, School of  
Chemistry, Tel Aviv University, Tel Aviv 69978, Israel*

### **Supporting Information Available**

- a. The Smoluchowski model.

## The Smoluchowski Model

The Smoluchowski model is used to describe the diffusion-assisted irreversible reaction  $A + B \rightarrow AB$ , where the concentration of B is in a great excess over A. In this study it is used to fit the time-resolved emission decay of the protonated and deprotonated forms of d-luciferin in a highly concentrated  $F^-$  aqueous solution.

We assumed that the  $F^-$  transport toward the  $NROH^*$  is the rate limiting step. The mathematical and computational details of the Smoluchowski model are given elsewhere.<sup>1</sup> According to the Smoluchowski model, the survival probability of a single (static) donor, an excited  $NROH$  molecule (the A particle), due to its irreversible reaction with a  $c = [Ac^-]$  (B is the  $Ac^-$  ion in the liquid) is given by<sup>2</sup>

$$S(t) = \exp\left(-c \int_0^t k(t') dt'\right) \quad (1)$$

where  $k(t)$  is the time-dependent rate coefficient for the donor-acceptor pair

$$k(t) = k_a p(a, t) \quad (2)$$

whose intrinsic proton transfer rate constant is  $k_a$ . The pair ( $NROH^*/Ac^-$ ) density distribution,  $p(r, t)$ , is governed by a three-dimensional Smoluchowski equation (diffusion in a potential  $U(r)$ ). When  $U(r) = 0$ , the above equations are analytically solvable for  $k(t)$ . Szabo<sup>2</sup> found an approximate expression for the time-dependent rate constant for the instances when  $U(r) \neq 0$ . When a potential is introduced, it behaves correctly at both  $t=0$  and  $t=\infty$ , i.e.,

$$k(0) = k_{PT} e^{-\beta U(a)}, \quad k(\infty) = [k(0)^{-1} + k_D^{-1}]^{-1} \quad (3)$$

$$\text{where} \quad k_D = 4\pi D a_e \quad (4)$$

is the diffusion-controlled rate constant, and  $a_e$  is an effective radius that depends on the Coulomb pair attraction potential.

The mutual diffusion constant of d-luciferin and  $F^-$  is estimated to be around  $1.10^{-5} \text{ cm}^2/\text{s}$  for a dilute aqueous solution with a viscosity of 1 centipoise. In concentrated NaAc solutions of several molar the viscosity rises with the concentration, whereas the mutual diffusion constant decreases, since it scales inversely with the viscosity. The effective long-time reaction rate constant is given by:

$$k(\infty) = \left( k(0)^{-1} + k_D^{-1} \right)^{-1} \quad (5)$$

where  $k_0$  and  $k_D$  are the intrinsic and diffusion-controlled rate constants, respectively.

If  $k_0 \ll k_D$  then  $k_\infty \ll k_D$ , and the reaction is nearly diffusion-controlled. Since the diffusion constant is small, the pseudo-first order reaction rate constant is given by

$$k_D' = 5 \times 10^9 \cdot c_B \text{ s}^{-1} \quad (6)$$

where  $c_B$  is the base concentration in molar units.

- 
1. Cohen, B.; Huppert, D.; Agmon, N. *J. Phys. Chem. A* **2001**, 105, 7165.
  2. Szabo, A. *J. Phys. Chem.* **1989**, 93, 6929.
